# Supplementary material for: Germanium monosulfide monolayer: a novel two-dimensional semiconductor with a high carrier mobility
Source: Royal Society of Chemistry journal article supplement (doi:10.1039/c6tc00454g), 2016-01-01
Supplement: c6tc00454g1.pdf [file c6tc00454g1.pdf]

**Electronic Supplementary Information**

**Germanium Monosulfide Monolayer: A Novel Two-Dimensional  
Semiconductor with High Carrier Mobility**

Feng Li, Xiuhong Liu, Yu Wang, Yafei Li,\*

College of Chemistry and Materials Science, Jiangsu Key Laboratory of  
Biofunctional materials, Nanjing Normal University, Nanjing 210023, China.

\*To whom correspondence should be addressed. Email: [liyafei.abc@gmail.com](mailto:liyafei.abc@gmail.com) (YL)

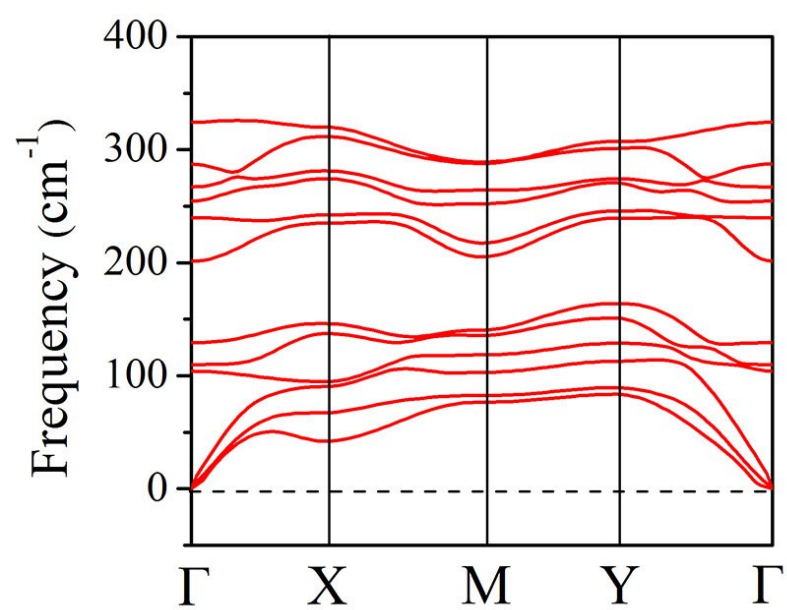

**Fig. S1** Phonon spectrum of GeS monolayer.

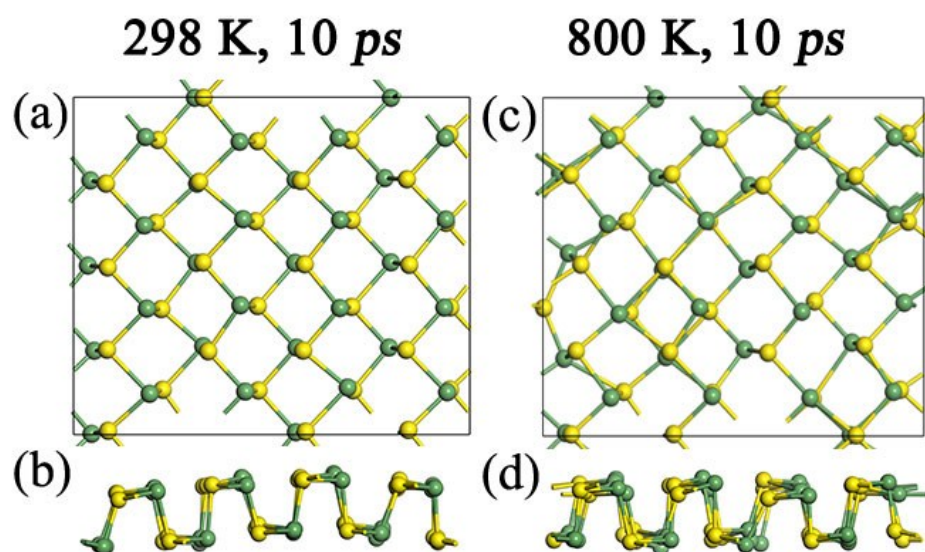

**Fig. S2** Snapshots of the equilibrium structures of GeS monolayer at (a) 298 K, and (b) 800 K, respectively, at the end of 10 ps first-principles molecular dynamic (MD) simulation.

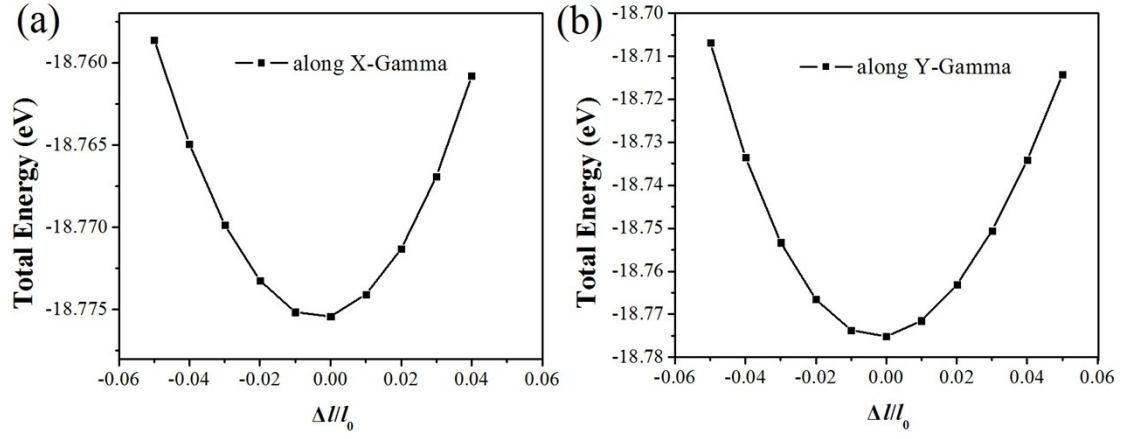

**Fig. S3** Total energy-strain relationship of GeS monolayer along  $x$  (a) and  $y$  (b) directions.  $\Delta/l$  refers to the dilation along  $x$  or  $y$ , while  $l_0$  refers to the lattice constant of  $a$  or  $b$  at equilibrium geometry.

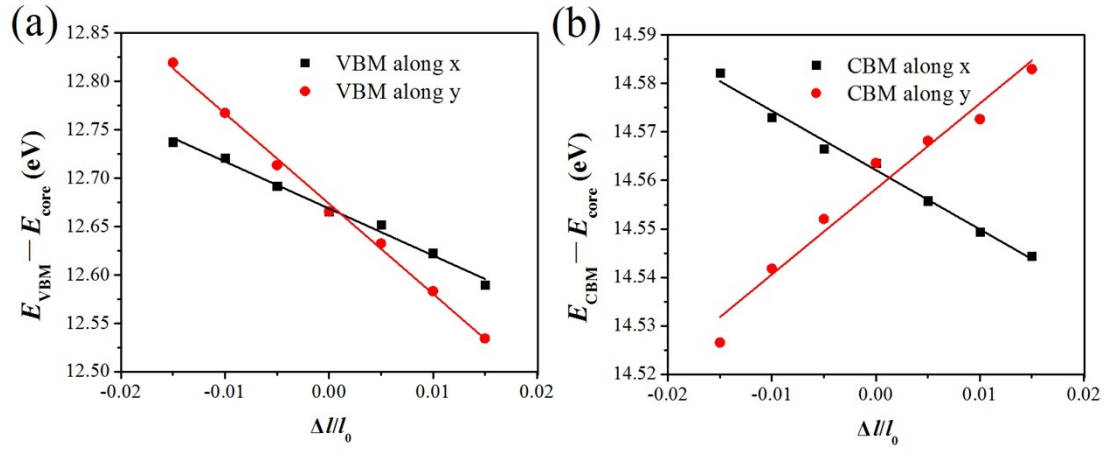

**Fig. S4.** Shifts of VBM and CBM under uniaxial strain along  $x$  and  $y$  directions for GeS monolayer.

**TABLE. S1.** At the PBE level, the carrier effective masses ( $m^*$ ), stretching modules ( $C$ ), deformation potential constant ( $E_1$ ), and carrier mobility ( $\mu$ ) of the investigated GeS monolayer.

| Carrier Type     | $m^*/m_0$ | $C$ (J m <sup>-2</sup> ) | $E_1$ (eV) | $\mu$ (cm <sup>2</sup> V <sup>-1</sup> s <sup>-1</sup> ) |
|------------------|-----------|--------------------------|------------|----------------------------------------------------------|
| electron ( $x$ ) | 0.26      | 15.48                    | 1.22       | $2.64 \times 10^3$                                       |
| electron ( $y$ ) | 0.40      | 51.59                    | 1.76       | $2.75 \times 10^3$                                       |
| hole ( $x$ )     | 0.19      | 15.48                    | 4.85       | $0.22 \times 10^3$                                       |
| hole ( $y$ )     | 0.62      | 51.59                    | 9.31       | $0.06 \times 10^3$                                       |
